# Supplementary material for: Polysaccharides from fermentedAsparagus officinaliswithLactobacillus plantarumNCU116 alleviated liver injuryviamodulation of glutathione homeostasis, bile acid metabolism, and SCFA production
Source: Royal Society of Chemistry journal article supplement (doi:10.1039/d0fo01435d), 2020-01-01
Supplement: d0fo01435d1.pdf [file d0fo01435d1.pdf]

1 **Supplementary Table 1.** Relative changes of bile acids involved in the heatmap  
2 compared with NC group. ↓ indicates decrease; and ↑ indicates increase when  
3 compared with CTX group. Abbreviations: CA, cholic acid; CDCA,  
4 chenodeoxycholic acid; TCA, taurocholic acid; T-β-MCA, tauro-β-muricholic acid;  
5 TCDCA, taurochenodesoxycholic acid; LCA, Lithocholic acid; HCA, hyocholic acid;  
6 TUDCA, tauroursodeoxycholic acid.

|               | Compounds | NC | AOP-H | FAOP-H |
|---------------|-----------|----|-------|--------|
| Primary BA    | CA        | ↓↓ | ↓     | ↓↓     |
|               | CDCA      | ↑↑ | ↑     | ↑↑     |
|               | TCA       | ↓↓ | ↑     | ↓      |
|               | TCDCA     | ↑↑ | ↑     | ↑↑     |
|               | T-β-MCA   | ↑↑ | ↑     | ↑↑     |
| Secondary BAs | LCA       | ↓↓ | ↓     | ↓↓     |
|               | HCA       | ↑↑ | ↑     | ↑↑     |
|               | TUDCA     | ↑↑ | ↑     | ↑↑     |

7

8
